# Supplementary material
Source: PubMed Central journal article supplement (PMC3433781)
Supplement: emboj2012221s1.pdf [file emboj2012221s1.pdf]

**Multivalent di-nucleosome recognition enables the Rpd3S histone deacetylase complex to tolerate decreased H3K36 methylation levels**

Jae-Wan Huh<sup>1,3,4</sup>, Jun Wu<sup>1,4</sup>, Chul-hwan Lee<sup>1</sup>, Miyong Yun<sup>1</sup>, Daniel Gilada<sup>1</sup>, Chad A. Brautigam<sup>2</sup> and Bing Li<sup>1,\*</sup>

1. Department of Molecular Biology, UT Southwestern Medical Center, 5323 Harry Hines Blvd., Dallas, TX 75390
2. Department of Biochemistry, UT Southwestern Medical Center, 5323 Harry Hines Blvd., Dallas, TX 75390
3. Current address: Department of Biochemistry and Molecular Biology, University of Ulsan College of Medicine, Seoul 138-736, Korea
4. These authors contributed equally

**Supplementary information:**

**6 supplementary figures**

**4 supplementary tables**

**Methods**

**Supplementary Figures:**

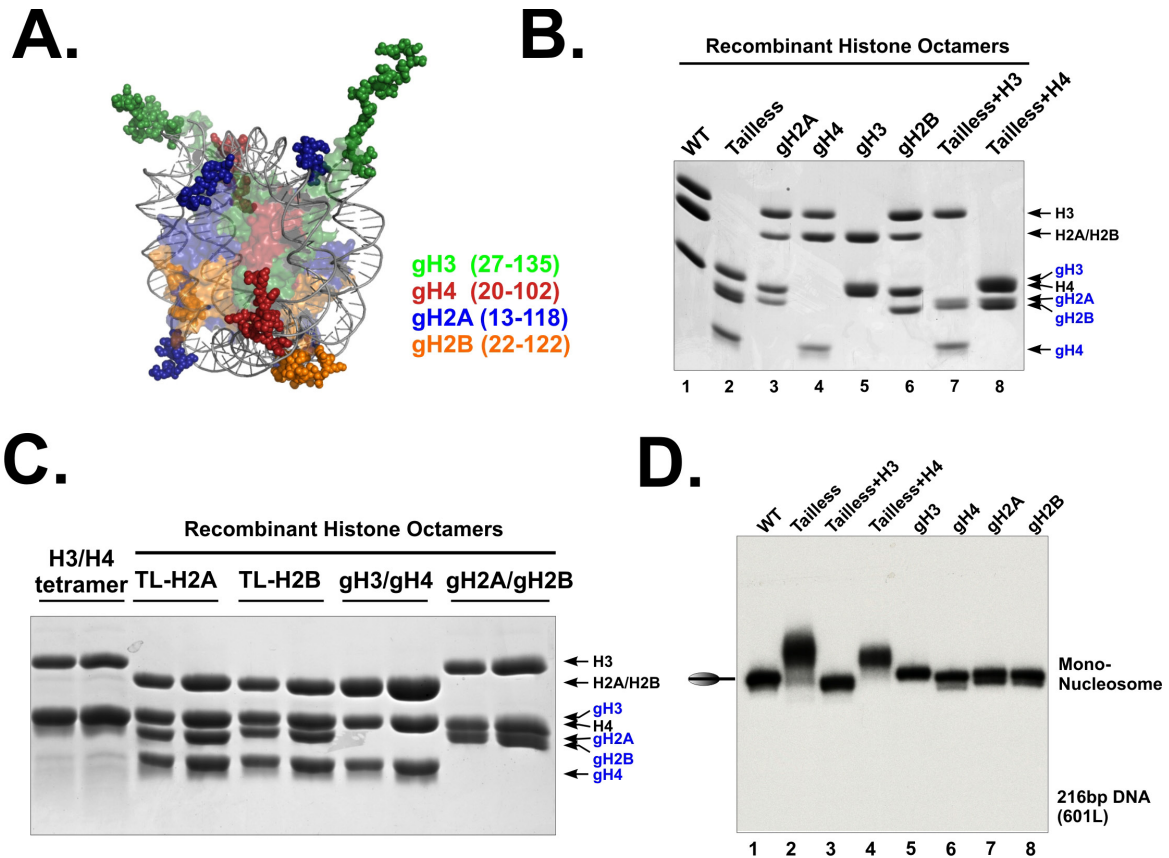

**Supplementary Figure 1. Preparation of tailless nucleosomes.**

(A) A structural view of nucleosomes (PDB 1KX5) rendered using the PyMOL Molecular Graphics System, Version 1.3, Schrödinger, LLC. Truncated portions of each histone tail are highlighted, and the remaining residues are indicated on the right side. (B and C) Coomassie Blue staining of reconstituted recombinant tailless histone octamers. (D) Combinations of tailless histone octamers are reconstituted into mono-nucleosomes with a 216 bp DNA template containing a 601 sequence that is positioned at the 5' end (601L). The resulting nucleosomes are resolved on a 5% native PAGE gel.

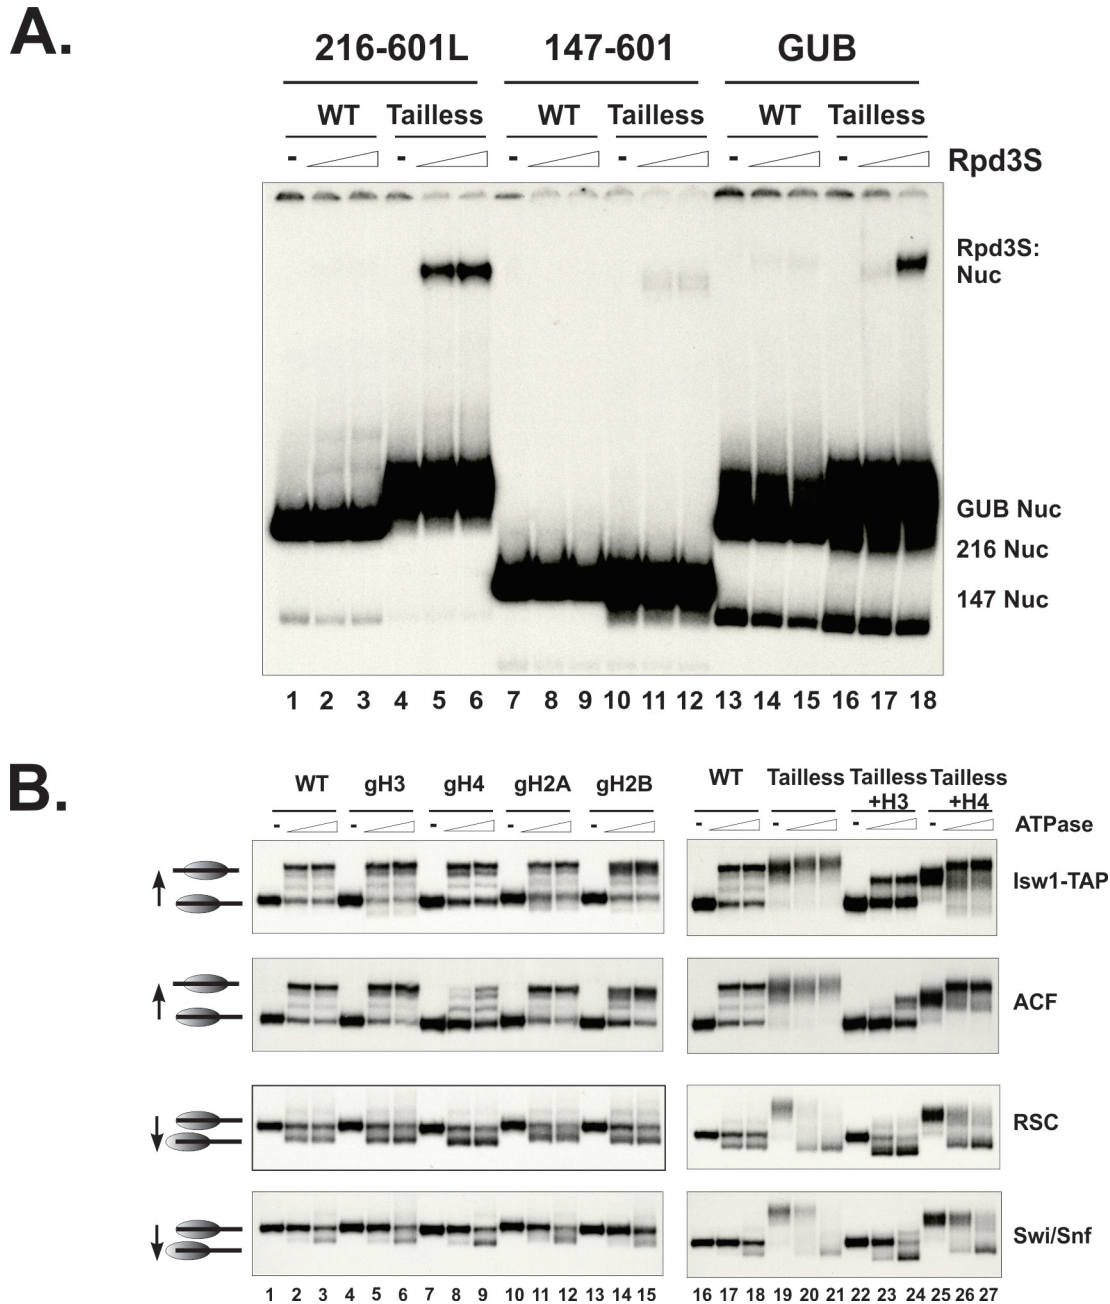

**Supplementary Figure 2. Rpd3S preferentially binds to tailless nucleosomes.**

(A). This experiment was carried out similarly to that shown in Figure 2, except that the 147 bp 601 DNA is amplified from pGEM-601R (Thastrom et al., 2004) and the GUB template was PCR amplified from pBL298 (pGUB  $\Delta$ SH-A1) (Li et al., 2005). (B). Sliding of tailless nucleosomes mediated by chromatin remodeling complexes. The 216 bp 601L DNA templates were reconstituted with the indicated tailless histone octamers, and the resulting nucleosomes were gel-purified before being tested in sliding assays.

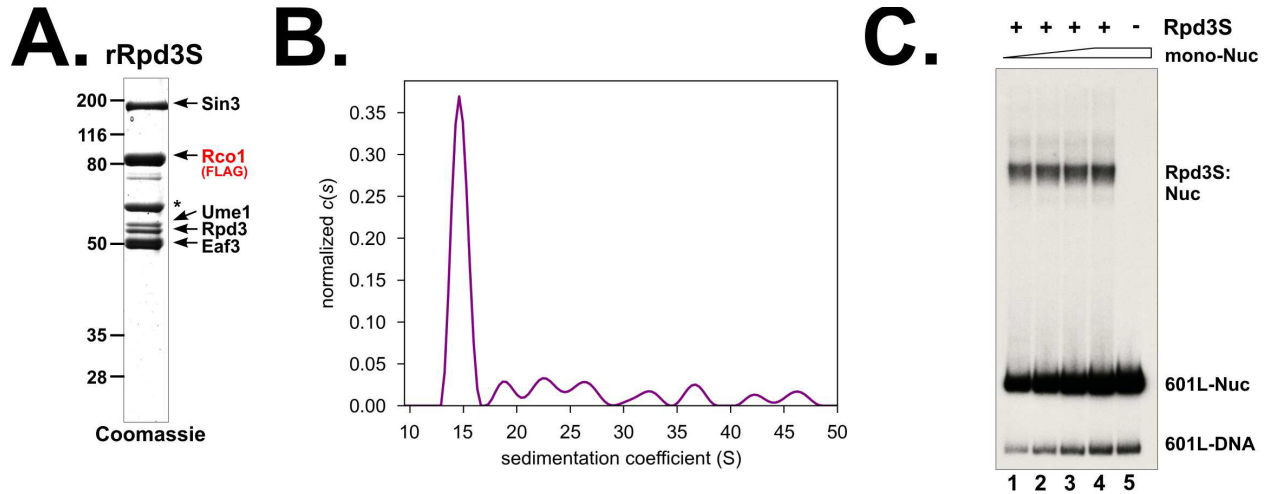

**Supplementary Figure 3. *Rpd3S* exists as a monomer as determined by analytical ultracentrifugation sedimentation velocity analysis.**

(A). Coomassie blue staining of purified recombinant Rpd3S complex which is used for AUC analysis. The asterisk represents a degraded form of Rco1-Flag. (B). Shown is the size distribution of Rpd3S normalized by the total signal (from analytical ultracentrifugation) observed sedimenting in the  $s_{20,w}$ -ranges displayed. (C) Rpd3S does not bind to two mono-nucleosomes at the same time. An increasing amount of mono-nucleosomes were incubated with fixed amount of Rpd3S.

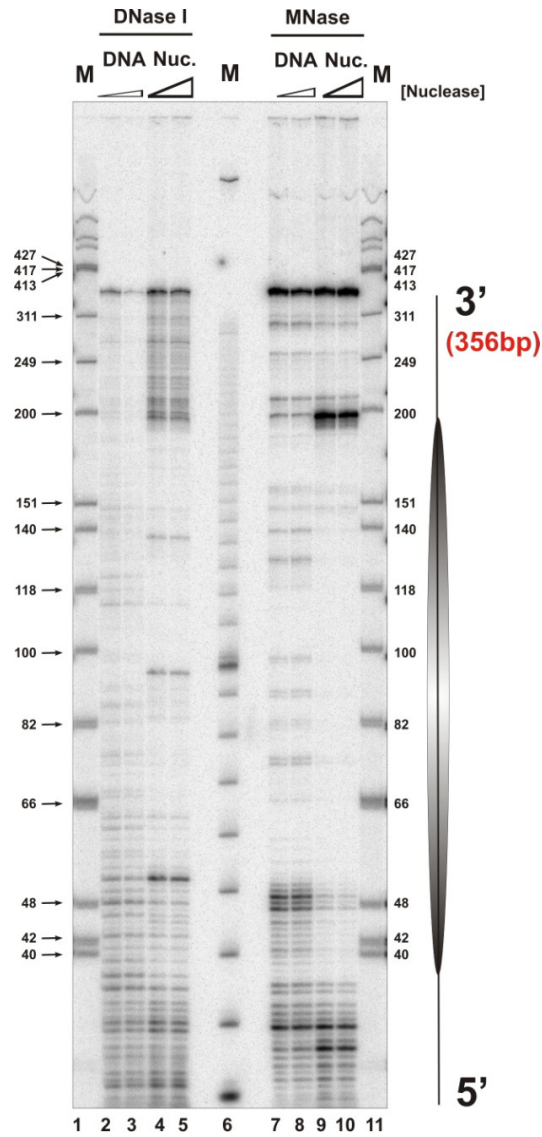

***Supplementary Figure 4. Mapping the positions of 356 bp mono-nucleosomes.***

By reconstituting the 356 bp DNA templates with a sub-saturating level of histone octamers, we detected a band on a native PAGE gel that migrates faster than the 356 bp di-nucleosomes prepared under standard conditions (Figure 4A, lane 13 vs. lane 16). To confirm that this band represents a mono-nucleosome species, we performed DNase I and MNase mapping of this nucleosomal population after gel purification. The results showed that only one nucleosome can be detected in this template, and its position is indicated on the right.

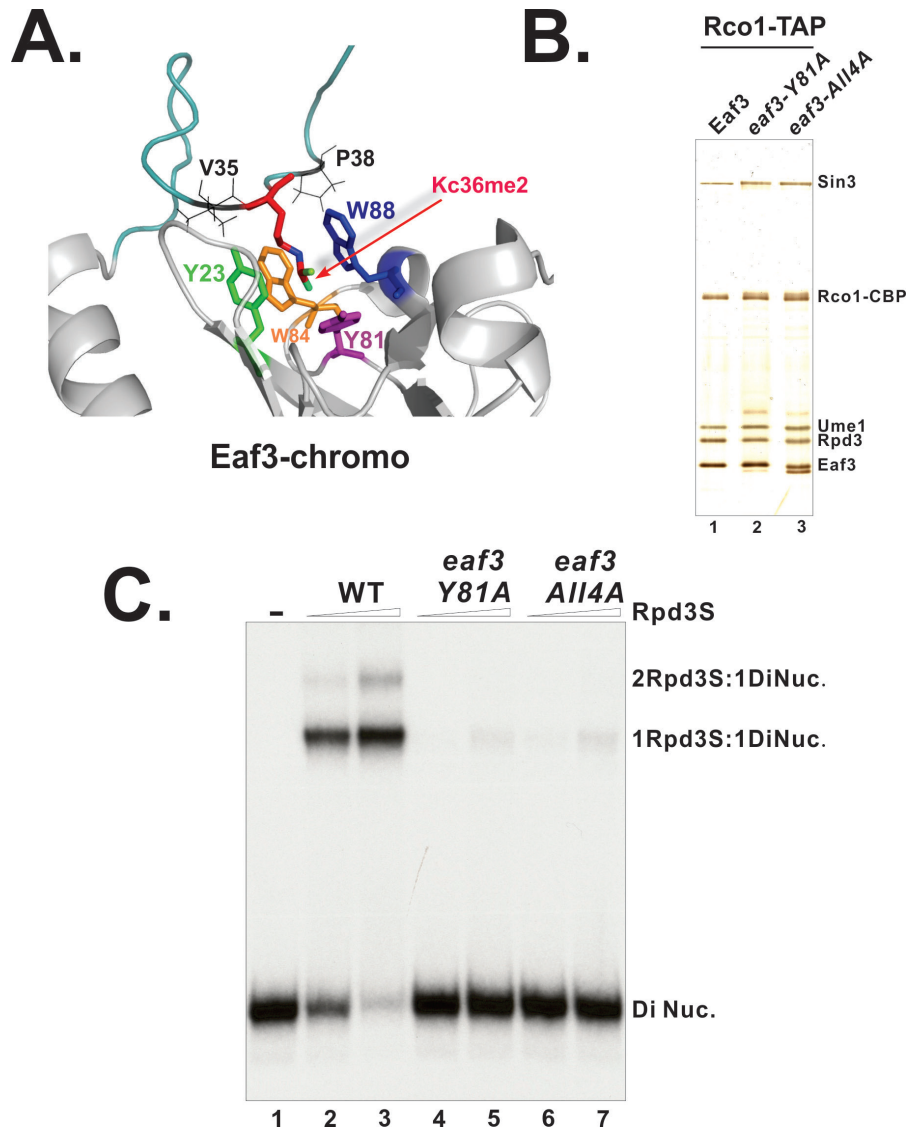

**Supplementary Figure 5. Mutations within the chromodomain of Eaf3 compromise the binding of Rpd3S to di-nucleosome templates.**

(A) A structural view of H3K36me2 binding to the chromo domain of Eaf3 (PDB 2K3Y) rendered using PyMOL. Four residues that form an aromatic cage for K36me2 (red) binding are labeled in different colored and highlighted. (B) Point mutations within the aromatic cage of CHD<sub>Eaf3</sub> do not disrupt the complex integrity of Rpd3S. Wide type and mutant Rpd3S complexes were TAP-purified from yeast strains (YBL583, YBL805(a single mutation Y81A) and YBL806 (quadruple mutations of all four residues to alanine (All4A)) and visualized by silver staining. (C). Mutations within CHD<sub>Eaf3</sub> compromise the binding of Rpd3S to di-nucleosome templates. Gel-mobility shift assays were carried out using wild type and mutated Rpd3S complexes, and H3K36 tri-methylated di-nucleosomes.

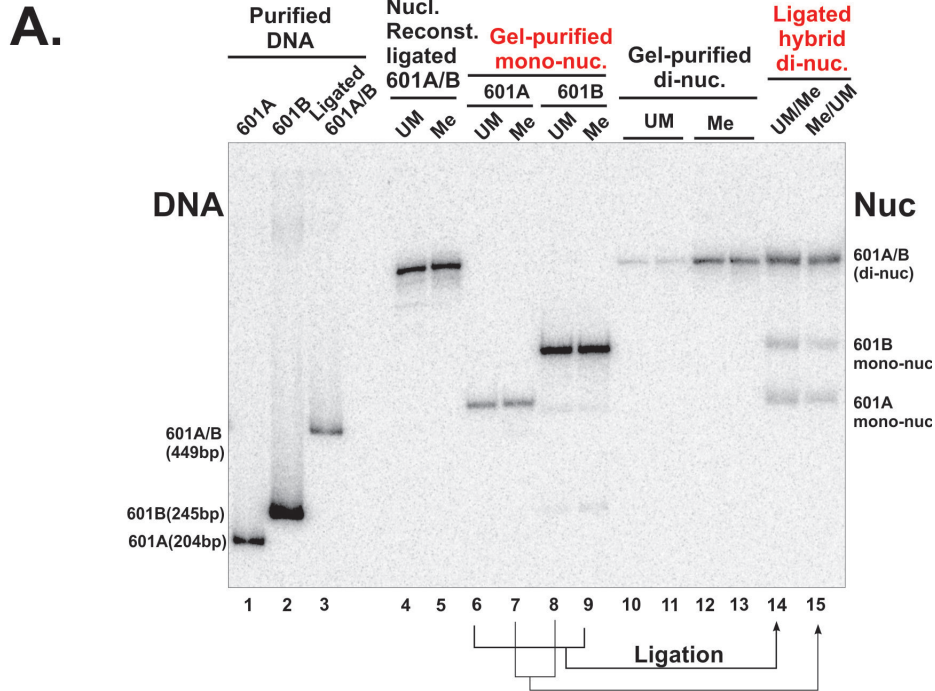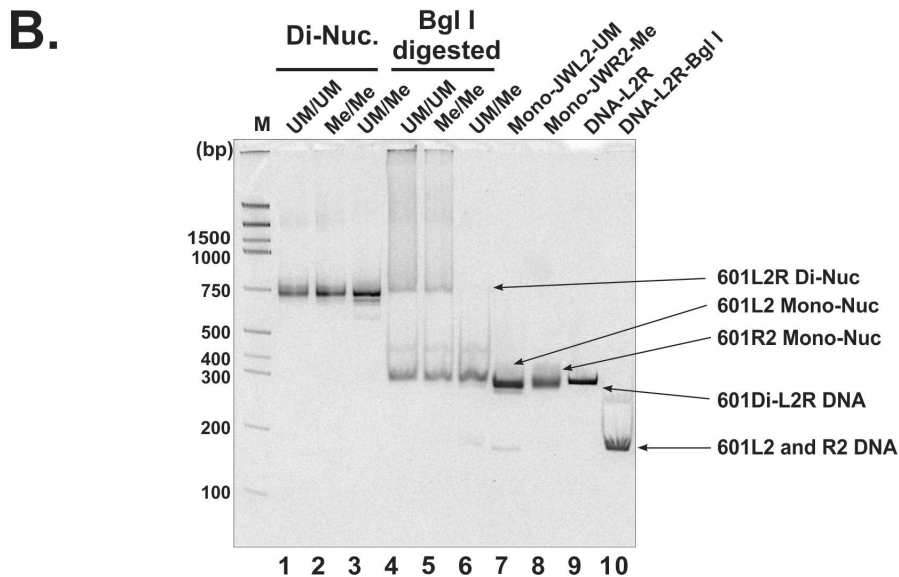

**Supplementary Figure 6. Generation of hybrid di-nucleosomal templates.**

(A). As illustrated in Figure 5A, hybrid di-nucleosomes were created by ligating two mono-nucleosomes (either unmodified or methylated) through non-palindromic restriction sites. Lanes 1 and 2, gel-purified 601A (digested by DraIII/BglI) and 601B (digested by BglI/PfI) fragments before nucleosome reconstitution. These two templates were reconstituted with either unmodified (UM) or K36me3 (me) histone octamers, and the resulting nucleosomes were gel-purified (lanes 6-9). Mono-nucleosomes in lanes 6 and 9 were ligated and the ligation mixtures were directly loaded in lane 14. Likewise, lanes 7 and 8 were paired and the ligated products

were run in lane 15. As a control, we also ligated 601A and 601B DNA together to form a 449 bp di-nucleosome DNA template (lane 3). Using the ligated DNA, we performed standard di-nucleosome reconstitution (lanes 4 and 5), and the resulting nucleosomes served as a marker to identify correct products from nucleosome ligation reactions. Lanes 10-13 contain gel-purified di-nucleosomes that consist of two identical mono-nucleosomes.

(B). Preparation of di-nucleosomal templates for histone deacetylase assay. To form hybrid di-nucleosomes, we ligated unmodified mono-nucleosomes (lane7) with methylated mono-nucleosomes (lane8) through a non-palindromic restriction site (Bgl I). The resulting ligated di-nucleosomes were purified through native preparative PAGE. To confirm that two nucleosomes within di-nucleosome templates are each properly positioned, purified di-nucleosomes (lane1-3) were digested with Bgl I and then loaded in lane 4-6. The migration of digested mono-nucleosomes (601JWL2 and 601JWR2) indicates that all three di-nucleosomes are positioned as expected.



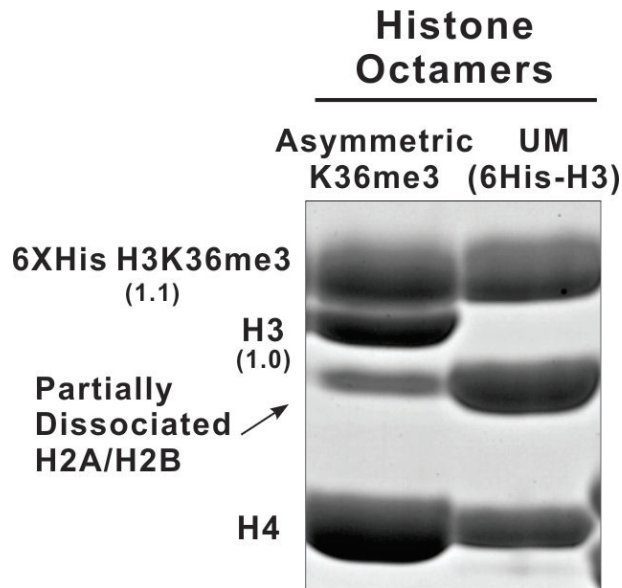

***Supplementary Figure 7. Preparation of asymmetric methylated histone octamers.*** Purified histone octamers are resolved on a 16% SDS-PAGE and stained by Coomassie blue. Wild-type octamers containing His-tagged H3 were loaded on the right as a control. The intensity of methylated H3 (6His H3K36me3) and wild-type H3 within asymmetric histone octamers are indicated in the parentheses, demonstrating an expected the ratio of 1.1 to 1.

## Supplementary Tables:

**Supplemental Table1. The list of chromatin templates used in this study**

| Chromatin templates | Description               | Number of Nucleosomes | Product size (bp) | PCR based         |                      | RE digested |                        | Figure Numbers     |         |
|---------------------|---------------------------|-----------------------|-------------------|-------------------|----------------------|-------------|------------------------|--------------------|---------|
|                     |                           |                       |                   | Plasmid templates | Primers <sup>a</sup> |             | Vectors                |                    | Enzymes |
|                     |                           |                       |                   |                   | 1                    | 2           |                        |                    |         |
| ChrT01              | 216-601L                  | Mono                  | 216               | pBL386            | 772                  | 773         |                        | 1A-C; 2A-F; 4A; S2 |         |
| ChrT02              | 216-601C                  | Mono                  | 227               | pBL386            | 1041                 | 1042        |                        | 1A                 |         |
| ChrT03              | 222-601L                  | Mono                  | 222               | pBL630            | 772                  | 1111        |                        | 3C, D; 4C          |         |
| ChrT04              | 196-Di                    | Di                    | 462               | pBL634            | 1111                 | 1112        |                        | 3A, B; 4C; S5      |         |
| ChrT05              | 153-Tri or 153-3          | Tri                   | 565               | pBL675            | 1111                 | 1112        |                        | 4E                 |         |
| ChrT06              | 196-Tri or 196-3          | Tri                   | 712               | pBL674            | 1111                 | 1112        |                        | 4E                 |         |
| ChrT07              | 187-601L                  | Mono                  | 187               | pBL386            | 772                  | 1042        |                        | 4A                 |         |
| ChrT09              | 266-601L                  | Mono                  | 266               | pBL386            | 772                  | 1126        |                        | 4A                 |         |
| ChrT10              | 316-601L                  | Mono                  | 316               | pBL386            | 772                  | 1127        |                        | 4A                 |         |
| ChrT11              | 356-601C                  | Mono or Di            | 356               | pBL386            | 1041                 | 1127        |                        | 4A; S4             |         |
| ChrT12              | 153-Di                    | Di                    | 364               | pBL635            | 1111                 | 1112        |                        | 4B                 |         |
| ChrT13              | Ligated ChrT19 and ChrT20 | Di                    | 452               |                   |                      |             |                        | 5B, C              |         |
| ChrT14              | 216EV-601L                | Mono                  | 222               |                   |                      |             | pBL645 EcoR V          | 6B, C              |         |
| ChrT17              | 147-601                   | Mono                  | 147               | pBL386            | 772                  | 801         |                        | S2                 |         |
| ChrT18              | GUB                       | Mono                  | 216               | pBL298            | 196                  | 197         |                        | S2                 |         |
| ChrT19              | 601-L1 or 601A            | Mono                  | 204               |                   |                      |             | pBL754 Dra III / Bgl I | S5A                |         |
| ChrT20              | 601-R2 or 601B            | Mono                  | 248               |                   |                      |             | pBL756 Bgl I / PflM I  | S5A                |         |
| ChrT23              | Di-L2R                    | Di                    | 353               |                   |                      |             | pBL837 DraIII/PflMI    | 6D, E, F           |         |
| ChrT24              | 601-JWL2                  | Mono                  | 178               |                   |                      |             | pBL897 Dra III / Bgl I | S5B                |         |
| ChrT25              | 601-JWR2                  | Mono                  | 175               |                   |                      |             | pBL903 Bgl I / PflM I  | S5B                |         |
| ChrT26              | Ligated ChrT24 and ChrT25 | Di                    | 353               |                   |                      |             |                        | 6F                 |         |

a. the serial number for each primer (see Supplemental Table 3)

**Supplemental Table 2. The list of plasmids used in this study**

| <b>Plasmids</b> | <b>Backbone</b> | <b>Plasmid description</b>                                        | <b>Source</b> |
|-----------------|-----------------|-------------------------------------------------------------------|---------------|
| pBL298          | pBend           | <i>pGUB ΔSH-A1</i>                                                | Workman JL    |
| pBL386          | pGEM-T          | <i>pGEM-3Z/601 reverse</i>                                        | Widom J       |
| pBL455          | pET3a           | <i>Xenopus gH3 (27-135)</i>                                       | Luger K       |
| pBL456          | pET3a           | <i>Xenopus gH4</i>                                                | Luger K       |
| pBL457          | pET3a           | <i>Xenopus gH2A</i>                                               | Luger K       |
| pBL458          | pET3a           | <i>Xenopus gH2B</i>                                               | Luger K       |
| pBL624          | pCR-Blunt       | <i>pCR-147bp-601L</i>                                             | This study    |
| pBL630          | pBluescript     | <i>pBS-1X 601-196L</i>                                            | This study    |
| pBL631          | pBluescript     | <i>pBS-1X 601-153C</i>                                            | This study    |
| pBL634          | pBluescript     | <i>pBS-2X 601-196L</i>                                            | This study    |
| pBL635          | pBluescript     | <i>pBS-2X 601-153C</i>                                            | This study    |
| pBL645          | pBluescript     | <i>pBS-216L-16X</i>                                               | This study    |
| pBL670          | pET21a          | <i>pET21-gH3K36C-6His</i>                                         | This study    |
| pBL674          | pBluescript     | <i>pBS-3X 601-196L</i>                                            | This study    |
| pBL675          | pBluescript     | <i>pBS-3X 601-153C</i>                                            | This study    |
| pBL749          | pCR-Blunt       | <i>pCR-B-601Di-L</i>                                              | This study    |
| pBL750          | pCR-Blunt       | <i>pCR-B-601Di-R</i>                                              | This study    |
| pBL752          | pBluescript     | <i>pBS-Di601-448bp 1X</i>                                         | This study    |
| pBL754          | pCR-Blunt       | <i>pCR-B-601Di-L1 (Dra III/Bgl I)</i>                             | This study    |
| pBL756          | pCR-Blunt       | <i>pCR-B-601Di-R2(Bgl I/PflM I)</i>                               | This study    |
| pBL760          | pET21a          | <i>pET21a-6His-xH3</i>                                            | This study    |
| pBL761          | pET21a          | <i>pET21a-6His-xH3K36C</i>                                        | This study    |
| pBL762          | pET21a          | <i>pET21a-gH3K36C</i>                                             | This study    |
| pBL808          | pBluescript     | <i>pBS-2bglI-linker4</i>                                          | This study    |
| pBL818          | pBL808          | <i>pBs-2bglI&amp;DraIIIM</i>                                      | This study    |
| pBL819          | pBL818          | <i>pBs-2bglI&amp;DraIIIM-linker (Kbg2-EV-DraIII-PflMI-EV-Bam)</i> | This study    |
| pBL837          | pBL819          | <i>pBS-2bglI&amp;DraIIIM-linker L2R-15</i>                        | This study    |
| pBL897          | pBL818          | <i>pBs-2bglI&amp;DraIIIM-linker-L2X10</i>                         | This study    |
| pBL903          | pBL818          | <i>pBs-2bglI&amp;DraIIIM-linker-R2X8</i>                          | This study    |

**Supplemental Table 3. The list of primers used in this study**

| <b>Primers</b> | <b>Sequence</b>                                         |
|----------------|---------------------------------------------------------|
| P196           | GATCCTCTAGACGGAGGACA                                    |
| P197           | GATCCCTCGATTCCATGG                                      |
| P772           | acaggatgtatatactgacacgtgcctgg                           |
| P773           | TGACCAAGGAAAGCATGATTCTTCACAC                            |
| P801           | CTGGAGAATCCCGGTGCCGAG                                   |
| P1004          | tctGGTACCCGGGAGATCTGATATCacaggatgtatatactgacacg         |
| P1005          | tctGGATCCGATATCTGACCAAGGAAAGCATGATTCTTCACAC             |
| P1006          | tctGGATCCGATATCCTTCACACCGAGTTCATCCCT                    |
| P1007          | tctGGATCCGATATCCTGGAGAATCCCGGTGCCGAG                    |
| P1041          | tatccgactggcaccggca                                     |
| P1042          | GAGTTCATCCCTTATGTGA                                     |
| P1111          | gctctagaactagtggatcc                                    |
| P1112          | GGTACCCGGGCGGGAGATCT                                    |
| P1126          | TGACACTATAGAATACTCAAGCT                                 |
| P1127          | AATTTACACAGGAAACAGCT                                    |
| P1188          | tctGCCATTCCGGCGGACCCTATACGCGGCCGCCCT                    |
| P1189          | tctGCCggaatGGCtatccgactggcaccggcaaggt                   |
| P1190          | tctGGATCCGATATCTCTTCACACCGAGTTCATCCCT                   |
| P1191          | GGTATGGTATTCTAGACACTACGTGccggcaaggtegctgttcaataca       |
| P1193          | TCTGCAGCCAATAGTTGGTCTTCACACCGAGTTCATCCCT                |
| P1369          | ctctCCCGAGCACTACGTGcgtgttcaatacatgcacagga               |
| P1371          | ctctCTCGGGGCCATTCCGGCCGCCCTGGAGAATCCCGGTGCCGA           |
| P1377          | ctctCCCGAGGCCggaatGGCacaggatgtatatactgaca               |
| P1367          | GATCCGATATCCACTACGTGAAACCAATAGTTGGGATATCAGATCTCCCGGGTAC |
| P1368          | CCGGGAGATCTGATATCCCAACTATTGGTTTTACGTAGTGGATATCG         |
| P1411          | ctctCTCGGGCCA ACTATTGGCCCTATACGCGGCCGCCCTGGA            |

*Supplemental Table 4. Yeast strains used in this study*

| <b>Name</b>   | <b>Parental Strain</b> | <b>Genotype</b>                                                                                     | <b>Source</b>     |
|---------------|------------------------|-----------------------------------------------------------------------------------------------------|-------------------|
| <b>YBL202</b> | BY4741                 | <i>MATa his3Δ1 leu2Δ0 met15Δ0 ura3Δ0 Rsc2-TAP::HIS3MX6</i>                                          | Open Biosystems   |
| <b>YBL218</b> | BY4741                 | <i>MATa his3Δ1 leu2Δ0 met15Δ0 ura3Δ0 isw1-TAP::HIS3MX6</i>                                          | Open Biosystems   |
| <b>YBL220</b> | BY4741                 | <i>MATa his3Δ1 leu2Δ0 met15Δ0 ura3Δ0 chd1-TAP::HIS3MX6</i>                                          | Open Biosystems   |
| <b>YBL291</b> | BY4741                 | <i>MATa his3Δ1 leu2Δ0 met15Δ0 ura3Δ0 Epl1-TAP::HIS3MX6</i>                                          | Open Biosystems   |
| <b>YBL489</b> | JLW553                 | <i>MATa, ura3-1 lys2Δ::hisG trp1-1 his3-11,15 leu2-3,112 can1-100 SNF6TAP:KITRP1, SWI2HA:KANMX6</i> | Workman J.        |
| <b>YBL583</b> | BY4741                 | <i>MATa his3Δ1 leu2Δ0 met15Δ0 ura3Δ0 Rco1-TAP::HIS3MX6</i>                                          | Open Biosystems   |
| <b>YBL584</b> | BY4741                 | <i>MATa his3Δ1 leu2Δ0 met15Δ0 ura3Δ0 Ada2-TAP::HIS3MX6</i>                                          | Open Biosystems   |
| <b>YBL619</b> | YBL555                 | <i>MATalpha his3Δ1 leu2Δ0 lys2Δ 0 ura3Δ0 eaf3-chd77-113Δ Flag:Leu2 Rco1-TAP::HIS</i>                | (Li et al., 2007) |
| <b>YBL634</b> | YBL632                 | <i>MATa his3Δ1 leu2Δ0 met15Δ0 ura3Δ0 Rco1-ΔPhD-TAP:HIS</i>                                          | (Li et al., 2007) |
| <b>YBL805</b> | YBL742                 | <i>MATa his3Δ1 leu2Δ0 met15Δ0 ura3Δ0 Eaf3-CD1-Y81A RCO1-C-TAP::HIS</i>                              | This study        |
| <b>YBL806</b> | YBL745                 | <i>MATa his3Δ1 leu2Δ0 met15Δ0 ura3Δ0 Eaf3-CD1-Y23A/Y81A/W84A/W88A RCO1-C-TAP::HIS</i>               | This study        |

## **Methods:**

### ***Plasmid constructs***

Vectors that contain different numbers of repeating sequences for nucleosome reconstitution were generated using two strategies:

(1) *Step-wise propagation of repeating sequences using a KpnI/BglI/BamHI cassette (Dyer et al., 2004).* The basic units of each repeat were amplified from the pBL386 (pGEM-601R) plasmid (Thastrom et al., 2004) using specific primer sets listed in Supplemental Table S4. For instance: *for the 196L fragment* (a 196 bp DNA with the 601 positioning sequence being at the lateral position), primers P1004 and P1006 were used; whereas P1004 and P1007 were paired to amplify *the 153C fragment* (a 153 bp DNA with 601 locating at the center). Restriction-digested PCR products were then inserted into pBluescript vector at the BamHI/KpnI site to form pBL630 and pBL631, which contain one copy of each 601-containing fragment. Multiple copies of these single units were then built round-by-round using the KpnI/BglI/BamHI cloning strategy (Dyer et al., 2004) to make pBL634, pBL635, pBL674 and pBL675. pBL645, pBL674, pBL675 and pBL811 were also generated in similar fashion.

(2) *Tandem ligation to generate multiple repeats of non-palindromic DNA fragments.*

To create DNA fragments for the nucleosome ligation experiments (Figure 5A and Supplementary Figure 6A), a 204 bp DNA fragment (601A) and a 245 bp DNA (601B) were generated by PCR from pBL386 using primer set P1191/P1188 and P1189/P1193, respectively. Both PCR products were cloned into pCR-Blunt vectors to create pBL754 and pBL756. To engineer a vector free of the Bgl I site, pBluescript vector was subjected to multiple rounds of PCR mutagenesis to remove two internal Bgl I sites, and a non-palindromic AvaI (CCCGAG) linker was subsequently inserted between two original AvaI sites to generate pBL808. We further removed a DraIII site from pBL808 to generate pBL818. An adaptor DNA was made by annealing primer P1367/P1368 and inserted into pBL818 to form pBL819. To prepare a large quantity of ligatable DNA for HADC assay substrates, the 601JWL2 and 601JWR2 sequences were amplified from pBL386 using primers P1369/P1371 and P1377/P1411, all of which contain a compatible non-palindromic AvaI site at the 5' ends. Purified PCR products were digested by AvaI and ligated into AvaI-digested pBL818 to generate pBL897 (10 copies of 601JWL2) and pBL903 (8 copies of 601JWR2). DraIII/BglI fragment from pBL897 and BglI/PflMI fragment

from pBL903 were mixed together and ligated into pBL819 to form pBL837, which contains one copy of Di-L2R (ChrT23) that can be released by DraIII/PfI-MI double digestion.

### ***Nucleosome preparation and chromatin-based biochemical assays***

#### *1. Preparation of recombinant histone octamers:*

Recombinant *Xenopus* histones were individually purified and reconstituted into histone octamers using a previous protocol (Li et al., 2007). Histone H3K36 methylated histones were prepared using the Methyl-Lysine Analog (MLA) approach (Li et al., 2009; Simon et al., 2007). The completion of the chemical reaction was confirmed by mass-spectrometry analysis and/or western blotting.

Preparation of asymmetrically modified histone octamers (within a histone octamer, one histone H3 is methylated at K36 and the other one is unmethylated) was based on a published method (Li and Shogren-Knaak, 2008). Briefly, pBL761 was transformed into BL21(DE3) codon plus cells to over-express HIS tagged *Xenopus* H3K36C mutant (6His-xH3K36C). Recombinant histones were purified under the standard denaturing condition, and subjected to the chemical modification (MLA) as described above to make 6His-xH3K36me3. We then mixed 130.5nmol of wild-type histone H3, 14.5nmol of 6His-xH3K36me3, and 145nmol of each xH4, xH2A and xH2B. Histone octamers were isolated using a Superdex 200 gel-filtration column. After octamer-containing fractions were pooled, 150 $\mu$ l of pre-washed TALON affinity resin (Clontech) was added into the mixture and incubated at 4°C for 3hrs. Resins were then washed with 4 ml of AM-Ni-wash buffer (10mM Tris PH7.5, 2M NaCl and 20mM Imidazole) and eluted with 1ml of AM-Ni-elution buffer (10mM Tris PH7.5, 2M NaCl and 250mM Imidazole). The eluent was equilibrated in 10mM Tris PH7.5, 2M NaCl and 5mM  $\beta$ ME, and concentrated. For some unknown reason, H2A/H2B dimer was partially dissociated from asymmetric octamer (Supplementary Figure 7) when TALON resin was used. To compensate for this loss, a proper amount of H2A/H2B dimer was added along with asymmetric octamers to ensure normal nucleosome formation.

#### *2. Chromatin templates:*

All DNA templates used for nucleosome reconstitution were listed in ***Supplemental table 1***, and sorted by the Chromatin Template (ChrT) number.

1) Small-scale preparation of radio-labeled probes:

DNA templates used in Figure 2-5 were end-labeled as previously described (Li et al., 2007). Di-nucleosome and tri-nucleosome DNA probes (ChrT04, ChrT05, ChrT06 and ChrT12) were PCR amplified from corresponding vectors (pBL634, pBL635, pBL674 or pBL675) using the same primer set- P1111/P1112

2) Large-scale DNA template preparation:

Mono-nucleosome templates (ChrT14: 216EV-601L) were isolated using a PEG precipitation based method (Dyer et al., 2004) from 10mg EcoRV-digested pBL645 plasmid. Di-nucleosome templates (ChrT23: Di-L2R) were purified through a preparative 3.5% native PAGE electrophoresis (Prep Cell 491, BioRad) starting from 5 mg DraIII/PflMI-digested pBL837. To prepare mono-nucleosome templates bearing non-palindromic ends (ChrT24, ChrT25) for nucleosome ligation experiments, 5mgs of each pBL897 and pBL903 were digested with DraIII/BglI or BglI/PflMI, respectively, and the intended DNA fragments were purified through a preparative 4% native PAGE electrophoresis.

3. *Nucleosome preparation:*

1-Reconstitution using radio-labeled probes: Nucleosome reconstitutions were carried out using a modified salt-dilution method (Owen-Hughes et al., 1999). Briefly, 1 pmol of gel-purified radio-labeled probe DNA (mono-, di- or tri-nucleosomal templates) was mixed with 2µg cold plasmid DNA, approximately 3 µg recombinant histone octamers (individually determined through titration), 100ng of BSA and 2 µl of 5M NaCl. The final volume was brought to 10 µl with H<sub>2</sub>O and serial salt dilution steps were followed as described previously (Li et al., 2009). The resulting nucleosomes were gel-purified and stored at 4°C (Yun et al., 2012).

2-Large-scale nucleosome preparation: The optimal ratios of histone octamers and any given DNA were determined using a similar salt-dilution method as described above, except that 1µg of cold DNA template was tested in each condition without any competitor plasmid DNA. 300µg of histone octamers were mixed with a proper amount of template DNA in a 1.25ml system in 2M NaCl. The mixtures were stepwise dialyzed against 300ml of each TEB (10mM Tris.HCl pH7.5, 1mM EDTA and 1mM β-ME) containing 2M, 1.2M, 1M, 0.8M, 0.6M NaCl for 2hrs at



30°C, and finally switched to 500ml TEB for 2 hrs at 4°C. All nucleosomes were then purified through preparative electrophoresis (Dyer et al., 2004).

3-Preparation of hybrid di-nucleosomes: To prepare radio-labeled hybrid di-nucleosomes for EMSA assays (Figure 5A), 100 µg of pBL754 (601A) and 100 µg of pBL756 (601B) plasmids were digested with DraIII/BglII or BglII/PflMI, respectively. The desired mono-nucleosome fragments were purified from a 2% agarose gel. Then, 1.5 µg of each (601A and 601B) fragment was end-labeled in a 40 µl PNK exchange reaction by adding 8 µl of 5X PNK exchange buffer (250 mM imidazole pH 6.4, 350 µM ADP, 60 mM MgCl<sub>2</sub>, 5 mM βME, 1 µl of γ-ATP and 3 µl of PNK from NEB). Reactions were carried out at 37°C for 1 hour followed by 55°C heat inactivation for 5 min. DNA was purified through a Qiagen PCR purification spin column. For each template, radioactivity incorporation (cpm/µl) was measured by a liquid scintillation counter, and DNA concentration (ng/µl) was determined by electrophoresis with standard DNA markers. The ratios of cpm over ng were then used to calculate and track the amount of DNA in the subsequent steps. Mono-nucleosome reconstitutions of 601A and 601B templates were carried out separately as described above. Nucleosomes were gel-purified and then mixed in pairs at equimolar amounts (shown in Supplementary Figure 6A). These mixtures were concentrated to a final volume of 45 µl using 30KD Amicon ultra 0.5 concentrators (Millipore). Then, 5 µl of 10X T4 ligase buffer and 10 units of T4 DNA ligase (NEB) were added. The ligation reactions were incubated at 16°C for 3 hrs before directly loading on a 4.5% native PAGE gel for purification.

To prepare a large quantity of hybrid di-nucleosomes for HDAC assays, 200µg of purified 601JWL2 (ChrT24) mono-nucleosomes and 220µg of purified 601JWR2 (ChrT25) mono-nucleosomes were mixed in a 300µl reaction containing 30µl 10X T4 ligase buffer, 3µl of 100mM ATP. 15µl of T4 ligase was then added and reactions were incubated at 16°C for 12 hrs. The resulting di-nucleosomes were finally purified through a preparative 3.5% native PAGE purification and concentrated. The quality of each nucleosome was confirmed as shown in Supplementary Figure 6B.

#### 4. Nucleosome mapping by DNaseI and MNase

<sup>32</sup>P-end-labeled nucleosomes (~10,000cpm) were incubated with different amounts of DNase I and MNase (Worthington) at room temperature for 5 mins in a 15ul reaction system. The reactions were stopped by adding 120µl of STOP buffer (0.3M NaAC, 5mM EDTA, 0.1% SDS and 40µg/ml linear Acrylamide (Ambion)) and incubating at 55°C for 15 mins. Control and digested DNA was then purified and resolved on a 8% denaturing (urea) poly-acrylamide gel (Li and Reese, 2001).

*Analytical Ultracentrifugation.* The Rpd3S complex was prepared for centrifugation by dialyzing it extensively against a buffer containing 20 mM Tris pH 7.5, 50 mM NaCl, 0.02% IPEGAL, 0.17 mM EDTA, and 0.17 mM β-mercaptoethanol. The protein was placed in the sample sector a charcoal-filled Epon dual-sectored centerpiece that had been sandwiched between two sapphire windows and placed in a centerpiece housing. The dialysate was placed in the reference sector. The housing was positioned in an An50-Ti rotor (Beckman-Coulter) and placed in the centrifuge. This assembly was allowed to incubate overnight at 4 deg. C under vacuum. Afterwards, centrifugation was performed by rotor acceleration to 42,000 rpm. The data were analyzed using the c(s) distribution (Schuck (2000), Biophys. J., vol. 78, 1606) with systematic noise subtraction (Schuck & Demeler (1999), Biophys. J., vol, 76, 2288). Values for partial-specific volume, buffer density, and buffer viscosity were estimated using SEDNTERP (T.M. Laue, B.D. Shah, T.M. Ridgeway and S.L. Pelletier, Analytical Ultracentrifugation in Biochemistry and Polymer Science, Royal Society of Chemistry (Edited by S. Harding and A. Rowe), 1992, pp. 90-125.)

### **Supplementary References:**

1. Dyer, P.N., Edayathumangalam, R.S., White, C.L., Bao, Y., Chakravarthy, S., Muthurajan, U.M., and Luger, K. (2004). Reconstitution of nucleosome core particles from recombinant histones and DNA. *Methods Enzymol* 375, 23-44.
2. Li, B., Gogol, M., Carey, M., Lee, D., Seidel, C., and Workman, J.L. (2007). Combined action of PHD and chromo domains directs the Rpd3S HDAC to transcribed chromatin. *Science* 316, 1050-1054.
3. Li, B., Jackson, J., Simon, M.D., Fleharty, B., Gogol, M., Seidel, C., Workman, J.L., and Shilatifard, A. (2009). Histone H3 lysine 36 dimethylation (H3K36me2) is sufficient to recruit

the Rpd3s histone deacetylase complex and to repress spurious transcription. *J Biol Chem* 284, 7970-7976.

4. Li, B., Pattenden, S.G., Lee, D., Gutierrez, J., Chen, J., Seidel, C., Gerton, J., and Workman, J.L. (2005). Preferential occupancy of histone variant H2AZ at inactive promoters influences local histone modifications and chromatin remodeling. *Proc Natl Acad Sci U S A* 102, 18385-18390.

5. Li, B., and Reese, J.C. (2001). Ssn6-Tup1 regulates RNR3 by positioning nucleosomes and affecting the chromatin structure at the upstream repression sequence. *J Biol Chem* 276, 33788-33797.

6. Li, S., and Shogren-Knaak, M.A. (2008). Cross-talk between histone H3 tails produces cooperative nucleosome acetylation. *Proc Natl Acad Sci U S A* 105, 18243-18248.

7. Owen-Hughes, T., Utley, R.T., Steger, D.J., West, J.M., John, S., Cote, J., Havas, K.M., and Workman, J.L. (1999). Analysis of nucleosome disruption by ATP-driven chromatin remodeling complexes. *Methods Mol Biol* 119, 319-331.

8. Simon, M.D., Chu, F., Racki, L.R., de la Cruz, C.C., Burlingame, A.L., Panning, B., Narlikar, G.J., and Shokat, K.M. (2007). The site-specific installation of methyl-lysine analogs into recombinant histones. *Cell* 128, 1003-1012.

9. Thastrom, A., Bingham, L.M., and Widom, J. (2004). Nucleosomal locations of dominant DNA sequence motifs for histone-DNA interactions and nucleosome positioning. *J Mol Biol* 338, 695-709.

10. Yun, M., Ruan, C., Huh, J.W., and Li, B. (2012). Reconstitution of modified chromatin templates for in vitro functional assays. *Methods Mol Biol* 833, 237-253.
